# Supplementary material
Source: PubMed Central journal article supplement (PMC3588873)
Supplement: supp_M032615_jlr.M032615-5.pdf [file supp_M032615_jlr.M032615-5.pdf]

**Supplemental Table 1** Difference between FR and BQ LDL-C values by triglyceride (TG) and diabetes status subgroups.

| <b>Subgroup by triglyceride baseline</b>    | <b>N</b> | <b>Mean</b> | <b>SD</b> | <b>Median</b> | <b>25% Quartile</b> | <b>75% Quartile</b> |
|---------------------------------------------|----------|-------------|-----------|---------------|---------------------|---------------------|
| <b>Baseline Bias (mg/dL)</b>                |          |             |           |               |                     |                     |
| ≤ median                                    | 154      | -5.4        | 5.7       | -6            | -9                  | -2                  |
| > median                                    | 126      | -5          | 9.1       | -6            | -10                 | -1                  |
| <b>On Treatment Bias (mg/dL)</b>            |          |             |           |               |                     |                     |
| ≤ median                                    | 154      | -10.7       | 6.8       | -11           | -15                 | -7                  |
| > median                                    | 126      | -14         | 7.8       | -13.5         | -19                 | -9                  |
| <b>Subgroup by diabetes status (no/yes)</b> |          |             |           |               |                     |                     |
| <b>Baseline Bias (mg/dL)</b>                |          |             |           |               |                     |                     |
| No                                          | 123      | -4          | 7.4       | -5            | -8                  | 0                   |
| Yes                                         | 157      | -6.2        | 7.4       | -6            | -11                 | -2                  |
| <b>On Treatment Bias (mg/dL)</b>            |          |             |           |               |                     |                     |
| No                                          | 123      | -11.3       | 6.2       | -11           | -14                 | -8                  |
| Yes                                         | 157      | -12.9       | 8.2       | -12           | -18                 | -8                  |
