# Supplementary material
Source: PubMed Central journal article supplement (PMC3588873)

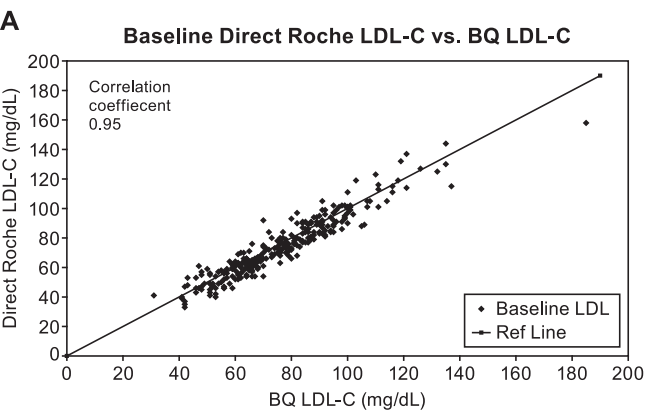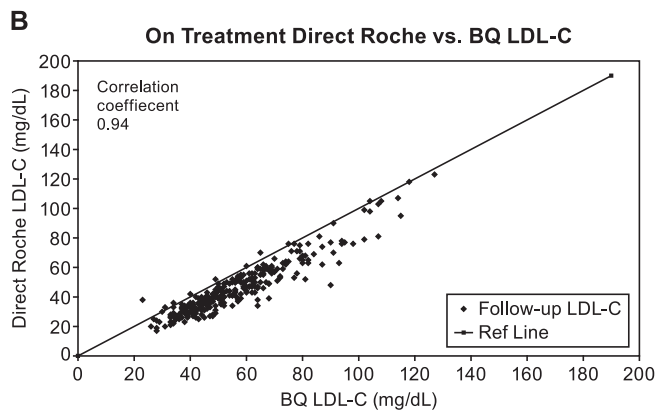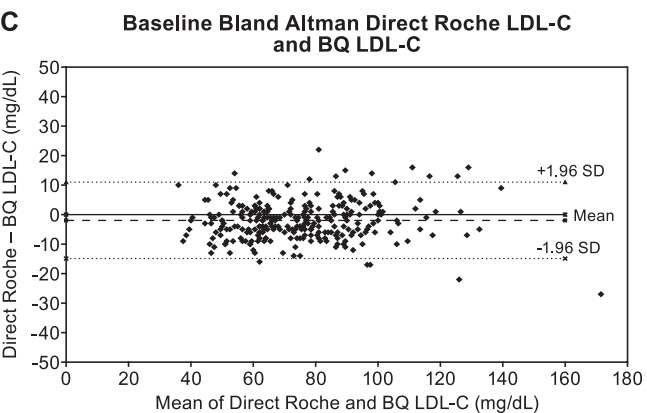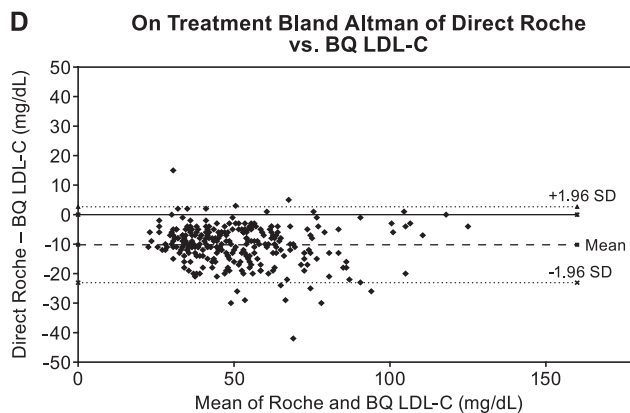

Supplement: supp_M032615_jlr.M032615-1.pdf [file supp_M032615_jlr.M032615-1.pdf]

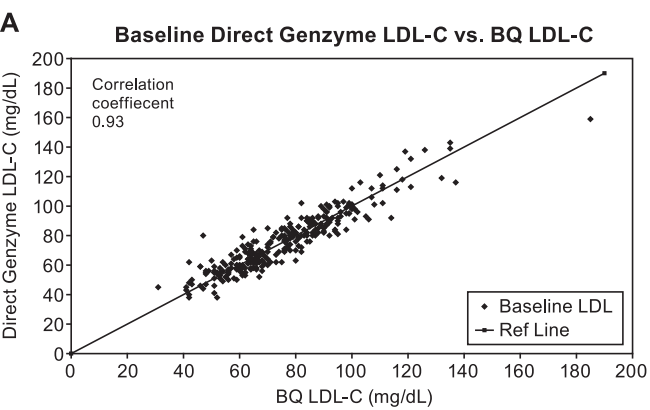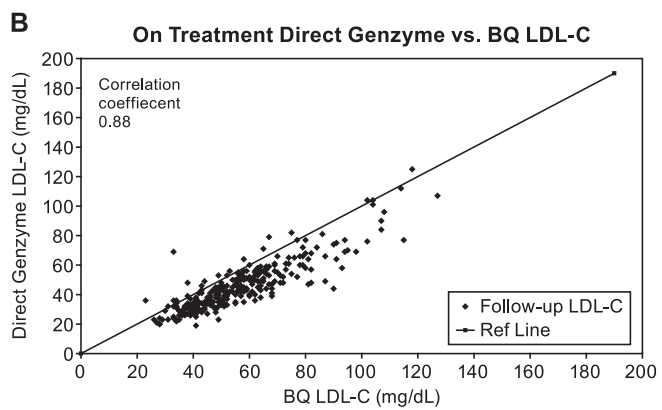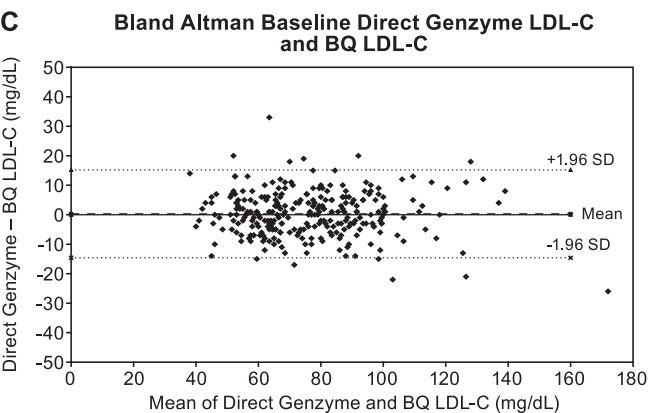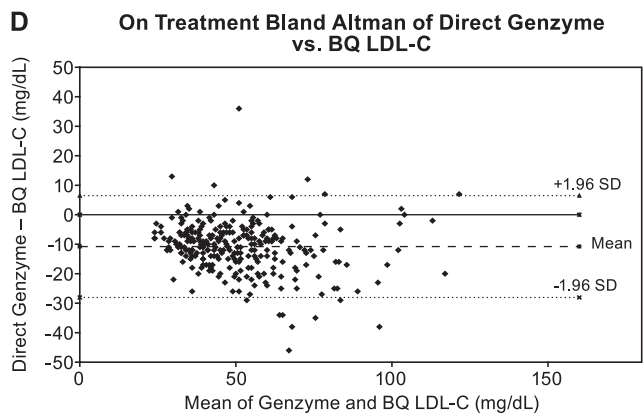

Supplement: supp_M032615_jlr.M032615-2.pdf [file supp_M032615_jlr.M032615-2.pdf]

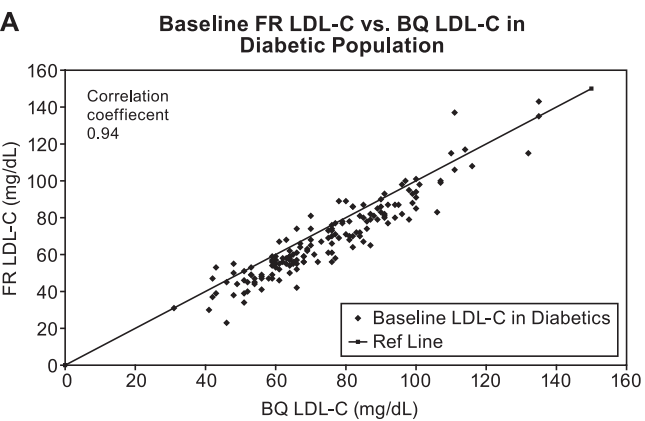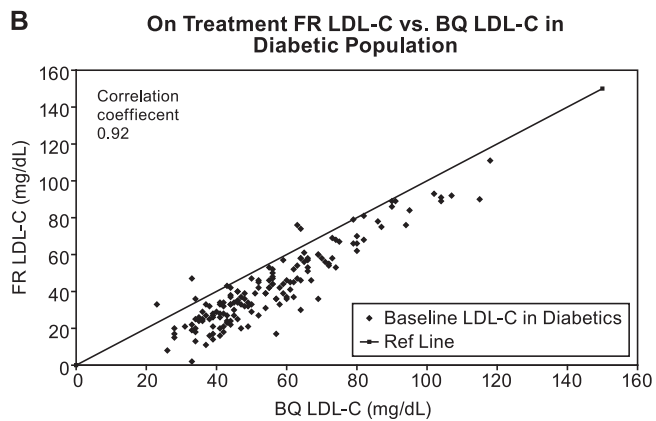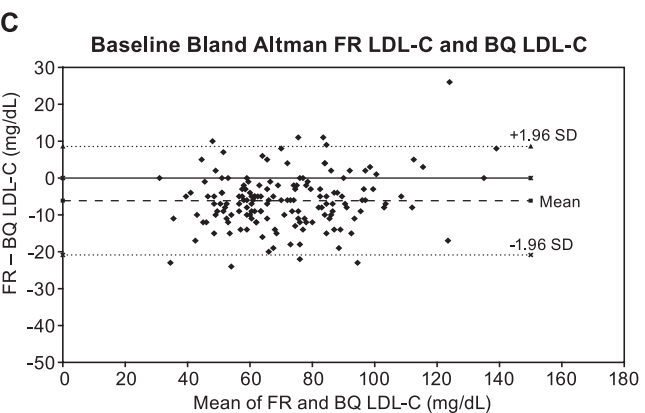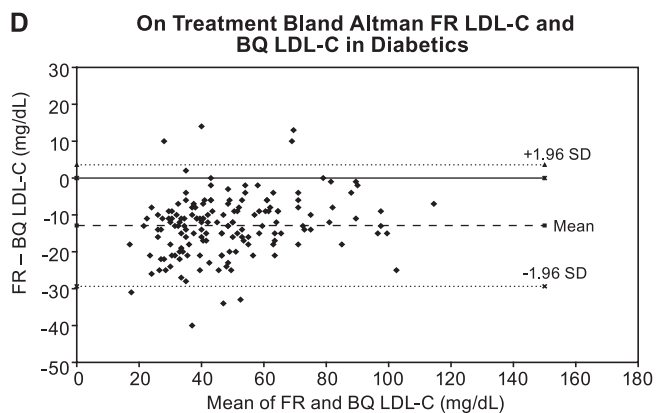

Supplement: supp_M032615_jlr.M032615-3.pdf [file supp_M032615_jlr.M032615-3.pdf]

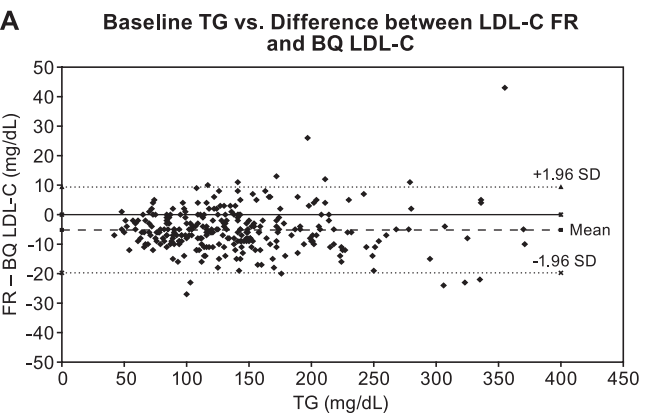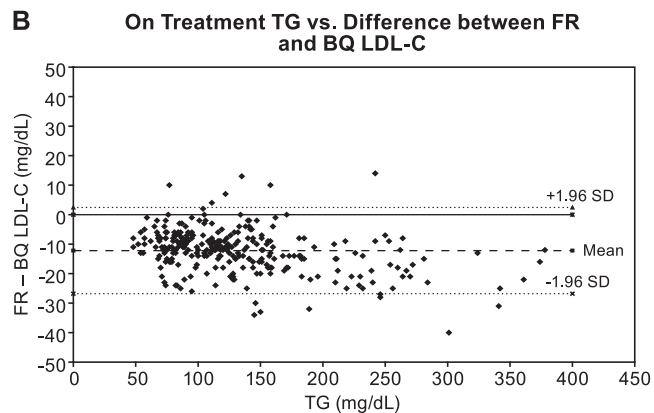

Supplement: supp_M032615_jlr.M032615-4.pdf [file supp_M032615_jlr.M032615-4.pdf]
